# Supplementary material
Source: MDPI journal article supplement (https://www.mdpi.com/2813-0227/4/1/7)
Supplement: s1 [file s1]

## Contents

|                                                                                                                                                               |    |
|---------------------------------------------------------------------------------------------------------------------------------------------------------------|----|
| Contents .....                                                                                                                                                | 1  |
| Instructions .....                                                                                                                                            | 4  |
| 0 Preliminary information .....                                                                                                                               | 5  |
| 1. ID DB.....                                                                                                                                                 | 5  |
| 2. Date .....                                                                                                                                                 | 5  |
| A Database attributes.....                                                                                                                                    | 5  |
| A.1 General information.....                                                                                                                                  | 5  |
| 3. What is the official name of the data collection? .....                                                                                                    | 5  |
| 4. Which institution is primarily responsible for the data collection? .....                                                                                  | 7  |
| 5. For which populations data is recorded in the data collection? .....                                                                                       | 7  |
| 6. For what purposes is the data collected? .....                                                                                                             | 7  |
| 7. At what level is the data (primarily) collected? .....                                                                                                     | 8  |
| 8. How many data records are stored in the data collection on average within a year? (average of the last 3 previous years, excluding the current year) ..... | 8  |
| 9. Where do the funds for financing the data collection mainly come from? .....                                                                               | 8  |
| A.2 Quality.....                                                                                                                                              | 9  |
| 10. Is the sample selection standardised? .....                                                                                                               | 9  |
| 11. Is the data collection standardised? .....                                                                                                                | 9  |
| A.3 Documentation .....                                                                                                                                       | 10 |
| 12. Is the sample selection process documented? .....                                                                                                         | 10 |
| 13. Is the data processing documented? .....                                                                                                                  | 10 |
| 14. Are changes to variable definitions or changes to the procedure documented? .....                                                                         | 10 |
| A.4 Data verification and publication .....                                                                                                                   | 12 |
| 15. Is an original data comparison carried out, i.e. a check of whether the data elements match the original data by means of a random sample?.....           | 12 |
| 16. Will the data be published? .....                                                                                                                         | 12 |
| 17. Is the data included into regular reports? .....                                                                                                          | 12 |
| A.5 Access.....                                                                                                                                               | 13 |
| 18. Who should be contacted in case of questions regarding the data collection (e.g. department)?.....                                                        | 13 |
| 19. To what extent is general access to data possible (aggregated if necessary)? Is the following permitted: ..                                               | 13 |
| 20. If available, what is the web address for data export/access? .....                                                                                       | 13 |
| A.6 Technical data .....                                                                                                                                      | 14 |
| 21. Which collection data type is involved? .....                                                                                                             | 14 |
| 22. What is required on the client side to access the data collection? (Web application, program, etc.) .....                                                 | 14 |

|                                                                                                                                                                                 |           |
|---------------------------------------------------------------------------------------------------------------------------------------------------------------------------------|-----------|
| 23. In which formats can data be exported? .....                                                                                                                                | 14        |
| 24. Why was the information on the data collection not fully recorded or why can the data collection not be included in the analysis?.....                                      | 15        |
| 25. Other comments and notes that have not yet been recorded .....                                                                                                              | 15        |
| <b>B Pathogen or disease .....</b>                                                                                                                                              | <b>16</b> |
| <b>Data type .....</b>                                                                                                                                                          | <b>16</b> |
| 26. Name of the pathogen or disease.....                                                                                                                                        | 16        |
| 27. How many data records on this pathogen are stored in the data collection on average within a year? (average of the last 3 previous years, excluding the current year) ..... | 16        |
| 28. For which populations are data on this pathogen/disease collected?.....                                                                                                     | 16        |
| 29. Comment on population restrictions.....                                                                                                                                     | 17        |
| 30. Important underlying legal standard for data collection .....                                                                                                               | 17        |
| 31. What type of data collection does the information come from? .....                                                                                                          | 17        |
| 32. Has a case definition/limit values/criteria/etc. been established for this pathogen/disease? .....                                                                          | 18        |
| 33. What information is available in the data on the pathogen or disease in question (whether complete or not)? .....                                                           | 18        |
| 34. What information is available on the specification of the pathogen (e.g. genus, species, subspecies)? .....                                                                 | 19        |
| 35. Is information on the sample matrix (sample material) included? .....                                                                                                       | 19        |
| 36 Which material is being examined? .....                                                                                                                                      | 20        |
| 37. What time information is available in connection with the information on infections/sampling/controls? .....                                                                | 20        |
| 38. Which information on origin is available in connection with the information on infections/sampling/controls?.....                                                           | 20        |
| 39. Which geographical information is available in the individual data set? .....                                                                                               | 21        |
| 40. Is the place of origin described in more detail? (e.g. type of operation, hospital ward) .....                                                                              | 21        |
| <b>Relation .....</b>                                                                                                                                                           | <b>22</b> |
| 41. For what period of time is the above information available? (In relation to the pathogen or the disease/sampling/controls) .....                                            | 22        |
| 42. For which geographical area is data available in the data collection? .....                                                                                                 | 22        |
| Specify all existing levels.....                                                                                                                                                | 22        |
| 43. What is the lowest aggregation level for which data is available? .....                                                                                                     | 22        |
| 44. Is there sampling plan for this type of infection data? .....                                                                                                               | 23        |
| 45. Who is involved in collecting the data (sampling and reporting)? .....                                                                                                      | 23        |
| 46. Has the data collected in the collection been processed in any way that would be relevant for secondary data use? .....                                                     | 23        |
| 47. How quickly is the data available in the data collection after it has been entered into the data collection? .....                                                          | 24        |
| 48. Why was the information on the pathogen or disease not fully recorded, or why can the pathogen or disease not be included in the analysis?.....                             | 24        |
| 49. Explanation of systematic errors and data accuracy .....                                                                                                                    | 24        |

---

|                                                                                        |    |
|----------------------------------------------------------------------------------------|----|
| 50. Other comments and notes that have not yet been recorded ( <i>Var_B_50</i> ) ..... | 25 |
|----------------------------------------------------------------------------------------|----|

## Instructions

**Text field:** for free text fields

(text/number)

A paragraph can be inserted in text fields with CTRL + Enter.

**Text field:** for date entries in the format DD.MM.YYYY

(DD.MM.YYYY)

**Multi-option field:** One or more checkboxes can be selected

☒ Option1

☒ Option2

**Single option field:** Only one option can be selected at a time

☐ Option1    ☒ Option2

**Conditional field (indented):** a previous option of another question must be selected

X.x Other\_x

**If Other has been selected, please explain in more detail:**

(Text)

---

## 0 Preliminary information

### 1. ID DB

(Datenquelle\_ID)

(Text)

### 2. Date

(Datum)

Start of the recording of information on the data collection.

(DD.MM.YYYY)

---

## A Database attributes

### A.1 General information

First, some information is collected that describes the data collection in general.

#### 3. What is the official name of the data collection?

(VAR\_A\_3)

(Text)

#### 3.a What is the short name of the data collection? (VAR\_A\_3\_a)

(Text)

#### 3.b Is the data collection pathogen-centered?

(VAR\_A\_3\_b)

☐ Yes

☐ No

☐ No information

3.b.1 If no was selected: Does the data collection contain information on the following areas?

☐ Use of antibiotics/drugs

☐ Environment

☐ Feed

☐ Other

3.b.1.x Other\_x

*If Other has been selected, please explain in more detail:*

*(Text)*

### 3.c Background on data collection and brief description of the data collection

*(VAR\_A\_3\_c)**(Text)*

### 3.d Link / Collection / URL and 3.e last access

| Link/Collection/URL <i>(VAR_A_3_e_1 - VAR_A_3_e_4)(Text)</i> | Last access <i>(VAR_A_3_e_1 - VAR_A_3_e_4)</i><br><i>(DD.MM.YYYY)</i> |
|--------------------------------------------------------------|-----------------------------------------------------------------------|
|                                                              |                                                                       |
|                                                              |                                                                       |
|                                                              |                                                                       |
|                                                              |                                                                       |
|                                                              |                                                                       |
|                                                              |                                                                       |
|                                                              |                                                                       |

4. Which institution is primarily responsible for the data collection?

(VAR\_A\_4)

(Text)

5. For which populations data is recorded in the data collection?

☐ Human (Var\_A\_5\_a)

☐ Feed (Var\_A\_5\_f)

☐ Pet (Var\_A\_5\_b)

☐ Environment (Var\_A\_5\_g)

☐ Wild animal (Var\_A\_5\_c)

☐ No information (Var\_A\_5\_h)

☐ Animal (if not specifiable) (Var\_A\_5\_d)

☐ Other (Var\_A\_5\_i)

☐ Food (Var\_A\_5\_e)

5.x Other\_x (Var\_A\_5\_i\_x)

**If Other has been selected, please explain in more detail:**

(Text)

6. For what purposes is the data collected?

☐ Prediction of (disease) outbreaks (Var\_A\_6\_a)

☐ Identification of outbreaks or unusual clusters (Var\_A\_6\_b)

☐ Monitoring of the health status of a population (Var\_A\_6\_c)

☐ Detection of rare cases of disease (Var\_A\_6\_d)

☐ Identification of risk factors (Var\_A\_6\_e)

☐ Proof of freedom from a specific disease or resistance (Var\_A\_6\_f)

☐ Evaluation of prevention, treatment or control measures (Var\_A\_6\_g)

☐ Tracing of an infection (Var\_A\_6\_h)

☐ Tracking the spread of an infection (Var\_A\_6\_i)

☐ Improvement of epidemiological knowledge regarding a disease (Var\_A\_6\_j)

☐ Health economic analyses (Var\_A\_6\_k)

☐ Ensuring the safety of food obtained from animals (Var\_A\_6\_m)

☐ Prevention of entry into the food chain from the environment via feed or food (Var\_A\_6\_n)

☐ No information (*Var\_A\_6\_l*)

☐ Other (*Var\_A\_6\_o*)

6.x Other\_x (*Var\_A\_6\_o\_x*)

***If Other has been selected, please explain in more detail:***

(Text)

7. At what level is the data (primarily) collected?

(*Var\_A\_7*)

Explanation: A data record or a line in the data collection describes, for example, a case, a sample, an animal ....

(Text)

8. How many data records are stored in the data collection on average within a year? (average of the last 3 previous years, excluding the current year)

(*Var\_A\_8*)

(number)

8.a Explanation of the number of data records: (*Var\_A\_8\_a*)

(Text)

9. Where do the funds for financing the data collection mainly come from?

(*Var\_A\_9*)

☐ Public sector

☐ Membership fees

☐ Private sector

☐ No information

☐ Charity organisation

☐ Other

9.x Other\_x (*Var\_A\_9\_x*)

***If Other has been selected, please explain in more detail:***

(Text)



## A.2 Quality

This is followed by some questions on the standardisation and documentation of the recorded information as well as some information on quality assurance.

### Definition:

**Standardisation:** Are the following work steps standardised, i.e. are there guidelines on how they are to be carried out and are these guidelines followed?

10. Is the sample selection standardised?

(Var\_A\_10)

- |                                      |                                      |
|--------------------------------------|--------------------------------------|
| <input type="radio"/> Yes completely | <input type="radio"/> No             |
| <input type="radio"/> Yes partially  | <input type="radio"/> No information |
| <input type="radio"/> Other          | <input type="radio"/> Not applicable |

10.x Other\_x (Var\_A\_10\_x)

***If Other has been selected, please explain in more detail:***

(Text)

11. Is the data collection standardised?

(Var\_A\_11)

- |                                      |                                      |
|--------------------------------------|--------------------------------------|
| <input type="radio"/> Yes completely | <input type="radio"/> No             |
| <input type="radio"/> Yes partially  | <input type="radio"/> No information |
| <input type="radio"/> Other          |                                      |

11.x Other\_x (Var\_A\_11\_x)

***If Other has been selected, please explain in more detail:***

(Text)

### A.3 Documentation

On the document the procedure: Are the following procedures documented, i.e. how, by whom and when is documentation carried out?

12. Is the sample selection process documented?

(Var\_A\_12)

- |                                      |                                      |
|--------------------------------------|--------------------------------------|
| <input type="radio"/> Yes completely | <input type="radio"/> No             |
| <input type="radio"/> Yes partially  | <input type="radio"/> No information |
| <input type="radio"/> Other          | <input type="radio"/> Not applicable |

12.x Other\_x (Var\_A\_12\_x)

***If Other has been selected, please explain in more detail:***

(Text)

13. Is the data processing documented?

(Var\_A\_13)

- |                                      |                                      |
|--------------------------------------|--------------------------------------|
| <input type="radio"/> Yes completely | <input type="radio"/> No             |
| <input type="radio"/> Yes partially  | <input type="radio"/> No information |
| <input type="radio"/> Other          |                                      |

13.x Other\_x (Var\_A\_13\_x)

***If Other has been selected, please explain in more detail:***

(Text)

14. Are changes to variable definitions or changes to the procedure documented?

(Var\_A\_14)

- |                                      |                                      |
|--------------------------------------|--------------------------------------|
| <input type="radio"/> Yes completely | <input type="radio"/> No             |
| <input type="radio"/> Yes partially  | <input type="radio"/> Not applicable |
| <input type="radio"/> Other          |                                      |

14.x Other\_x (Var\_A\_14\_x)

***If Other has been selected, please explain in more detail:***

(Text)

---

A.4 Data verification and publication

What audits are carried out to avoid incorrect values in the data collection? (Indicate "Yes systematically" if this is firmly anchored in the work process and takes place at certain intervals)

15. Is an original data comparison carried out, i.e. a check of whether the data elements match the original data by means of a random sample?

(Var\_A\_15)

☐ Yes systematically

☐ No

☐ Yes not systematically

☐ No information

16. Will the data be published?

(Var\_A\_16)

☐ Yes completely

☐ No

☐ Yes partially

☐ No information

17. Is the data included into regular reports?

(Var\_A\_17)

☐ Yes

☐ No

☐ No information

17. Which reports (add URL/DOI if applicable)

***If question 17 = yes, please explain in more detail:***

(VAR\_A\_17\_a\_1 - VAR\_A\_17\_a\_4)

(VAR\_A\_17\_b\_1 - VAR\_A\_17\_b\_4)

| URL/DOI (Text) | Last access (DD.MM.YYYY) |
|----------------|--------------------------|
|                |                          |
|                |                          |
|                |                          |
|                |                          |
|                |                          |

## A.5 Access

Some questions follow as to whether and to what extent access to the information is possible at all.

18. Who should be contacted in case of questions regarding the data collection (e.g. department)?  
(Var\_A\_18)

(Text)

19. To what extent is general access to data possible (aggregated if necessary)? Is the following permitted:

☐ Read public (Var\_A\_19\_a)

☐ Data export/use on request (Var\_A\_19\_d)

☐ Data export/use public (Var\_A\_19\_b)

☐ Access denied (Var\_A\_19\_e)

☐ Read on request (Var\_A\_19\_c)

☐ No information (Var\_A\_19\_f)

20. If available, what is the web address for data export/access?  
(Var\_A\_20)

(Text)

20.a If available, when was the last access?  
(Var\_A\_20\_a)

(DD.MM.YYYY)

## A.6 Technical data

Now we will look at some basic technical aspects for describing the data collection.

21. Which collection data type is involved?

- |                                                         |                                                               |
|---------------------------------------------------------|---------------------------------------------------------------|
| <input type="checkbox"/> Database ( <i>Var_A_28_a</i> ) | <input type="checkbox"/> JSON ( <i>Var_A_28_d</i> )           |
| <input type="checkbox"/> CSV ( <i>Var_A_28_b</i> )      | <input type="checkbox"/> No information ( <i>Var_A_28_e</i> ) |
| <input type="checkbox"/> XML ( <i>Var_A_28_c</i> )      | <input type="checkbox"/> Other ( <i>Var_A_28_f</i> )          |

21.x Other\_x (*Var\_A\_28\_f\_x*)

***If Other has been selected, please explain in more detail:***

(Text)

22. What is required on the client side to access the data collection? (Web application, program, etc.)  
(*Var\_A\_22*)

(Text)

23. In which formats can data be exported?

- |                                                      |                                                               |
|------------------------------------------------------|---------------------------------------------------------------|
| <input type="checkbox"/> Excel ( <i>Var_A_23_a</i> ) | <input type="checkbox"/> No information ( <i>Var_A_23_d</i> ) |
| <input type="checkbox"/> CSV ( <i>Var_A_23_b</i> )   | <input type="checkbox"/> Other ( <i>Var_A_23_e</i> )          |
| <input type="checkbox"/> PDF ( <i>Var_A_23_c</i> )   |                                                               |

23.x Other\_x (*Var\_A\_23\_e\_x*)

***If Other has been selected, please explain in more detail:***

(Text)

24. Why was the information on the data collection not fully recorded or why can the data collection not be included in the analysis?

(Var\_A\_24)



(Text)

25. Other comments and notes that have not yet been recorded

(Var\_A\_25)



(Text)

## B Pathogen or disease

To be completed for each pathogen or disease occurring in the data collection.

Data type

26. Name of the pathogen or disease

(Var\_B\_26)

(Text)

26.a Is the pathogen a zoonosis?

(Var\_B\_26\_a)

☐ Yes ☐ No ☐ No information

26.b Are antimicrobial susceptibility tests performed for this pathogen?

(Var\_B\_26\_b)

☐ Yes ☐ No ☐ No information

27. How many data records on this pathogen are stored in the data collection on average within a year?  
(average of the last 3 previous years, excluding the current year)

(Var\_B\_27)

(number)

27.a Explanation of the number of data records:

(Var\_B\_27\_a)

(Text)

28. For which populations are data on this pathogen/disease collected?

- |                                                                   |                                                      |
|-------------------------------------------------------------------|------------------------------------------------------|
| <input type="checkbox"/> Human (Var_B_28_a)                       | <input type="checkbox"/> Feed (Var_B_28_f)           |
| <input type="checkbox"/> Pet (Var_B_28_b)                         | <input type="checkbox"/> Environment (Var_B_28_g)    |
| <input type="checkbox"/> Wild animal (Var_B_28_c)                 | <input type="checkbox"/> No information (Var_B_28_h) |
| <input type="checkbox"/> Animal (if not specifiable) (Var_B_28_d) | <input type="checkbox"/> Other (Var_B_28_i)          |
| <input type="checkbox"/> Food (Var_B_28_e)                        |                                                      |



28.x Other\_x (Var\_B\_28\_i\_x)

***If Other has been selected, please explain in more detail:***

(Text)

29. Comment on population restrictions

(Var\_B\_29)

(Text)

30. Important underlying legal standard for data collection

(Var\_B\_30)

(Text)

31. What type of data collection does the information come from?

- |                                                                                 |                                                                                 |
|---------------------------------------------------------------------------------|---------------------------------------------------------------------------------|
| <input type="checkbox"/> Survey (Var_B_31_a)                                    | <input type="checkbox"/> Other case reports (voluntary/obligatory) (Var_B_31_g) |
| <input type="checkbox"/> Monitoring (e.g. AVV zoonosis food chain) (Var_B_31_b) | <input type="checkbox"/> Register (Var_B_31_h)                                  |
| <input type="checkbox"/> Sentinel (Var_B_31_c)                                  | <input type="checkbox"/> Mortality statistics (Var_B_31_i)                      |
| <input type="checkbox"/> Official sampling (Var_B_31_d)                         | <input type="checkbox"/> Census (Var_B_31_j)                                    |
| <input type="checkbox"/> Survey by doctors (Var_B_31_e)                         | <input type="checkbox"/> No information (Var_B_31_k)                            |
| <input type="checkbox"/> Case notification according to IfSG, TSG (Var_B_31_f)  | <input type="checkbox"/> Other (Var_B_31_l)                                     |

31.x Other\_x (Var\_B\_31\_l\_x)

***If Other has been selected, please explain in more detail:***

(Text)

32. Has a case definition/limit values/criteria/etc. been established for this pathogen/disease?

(Var\_B\_32)

Example case definition: [https://www.rki.de/DE/Content/Infekt/IfSG/Falldefinition/falldefinition\\_node.html](https://www.rki.de/DE/Content/Infekt/IfSG/Falldefinition/falldefinition_node.html)

☐ Yes ☐ No ☐ No information ☐ Not applicable

32a. If yes, what is the case definition/limits/criteria/etc.? (Var\_B\_32\_a)

(Text)

33. What information is available in the data on the pathogen or disease in question (whether complete or not)?

- ☐ Case report (Var\_B\_33\_a)
- ☐ Report on a Suspicious infection or finding (pathogen or disease not confirmed) (Var\_B\_33\_b)
- ☐ Sample result (laboratory diagnostic detection of pathogens) (Var\_B\_33\_c)
- ☐ Pathogen detection (cultural or PCR) (Var\_B\_33\_d)
- ☐ Sequencing (Var\_B\_33\_e)
- ☐ Antigen detection (e.g. ELISA) (Var\_B\_33\_f)
- ☐ Antibody detection (Var\_B\_33\_g)
- ☐ Health status (without sample/examination) (Var\_B\_33\_h)
- ☐ Examination result (based on the clinical picture by medical/veterinary staff e.g. test, clinical findings) (Var\_B\_33\_i)
- ☐ Diagnosis (Var\_B\_33\_j)
- ☐ Section/autopsy (Var\_B\_33\_k)
- ☐ Test result (other) (Var\_B\_33\_l)
- ☐ No information (Var\_B\_33\_m)

☐ Other (Var\_C\_36\_n)

33.x Other\_x (Var\_B\_33\_n\_x)

***If Other has been selected, please explain in more detail:***

(Text)

34. What information is available on the specification of the pathogen (e.g. genus, species, subspecies)?

☐ Genus (Var\_B\_34\_a)

☐ Serovar/type (Var\_B\_34\_d)

☐ Species (Var\_B\_34\_b)

☐ No information (Var\_B\_34\_e)

☐ Subspecies (Var\_B\_34\_c)

☐ Other (Var\_B\_34\_f)

34.x Other\_x (Var\_B\_34\_f\_x)

***If Other has been selected, please explain in more detail:***

(Text)

35. Is information on the sample matrix (sample material) included?

(Var\_B\_35)

☐ Yes

☐ No

☐ No information

35.a Further comments on the sample matrix

(Text)

**36 Which material is being examined?*****If question 35 = Yes, please explain in more detail:***

- |                                                     |                                                                                                    |
|-----------------------------------------------------|----------------------------------------------------------------------------------------------------|
| <input type="checkbox"/> Blood/serum (Var_B_36_a)   | <input type="checkbox"/> Meat (Var_B_36_g)                                                         |
| <input type="checkbox"/> Stool/feces (Var_B_36_b)   | <input type="checkbox"/> Environmental samples (not from individuals/ contact person) (Var_B_36_h) |
| <input type="checkbox"/> Urine (Var_B_36_c)         | <input type="checkbox"/> Animal feed (Var_B_36_i)                                                  |
| <input type="checkbox"/> Food (Var_B_36_d)          | <input type="checkbox"/> Divers (Var_B_36_j)                                                       |
| <input type="checkbox"/> Milk (Var_B_36_e)          | <input type="checkbox"/> No information (Var_B_36_k)                                               |
| <input type="checkbox"/> Tissue sample (Var_B_36_f) | <input type="checkbox"/> Other (Var_B_36_k)                                                        |

**36.x Other\_x (Var\_B\_36\_l\_x)*****If Other has been selected, please explain in more detail:*****(Text)****37. What time information is available in connection with the information on infections/sampling/controls?**

- |                                                                     |                                                         |
|---------------------------------------------------------------------|---------------------------------------------------------|
| <input type="checkbox"/> Date of beginning of outbreak (Var_B_37_a) | <input type="checkbox"/> Notification date (Var_B_37_e) |
| <input type="checkbox"/> Date of onset of illness (Var_B_37_b)      | <input type="checkbox"/> Date of treatment (Var_B_37_f) |
| <input type="checkbox"/> Date of sampling (Var_B_37_c)              | <input type="checkbox"/> No information (Var_B_37_g)    |
| <input type="checkbox"/> Date (laboratory) detection (Var_B_37_d)   | <input type="checkbox"/> Other (Var_B_37_h)             |

**37.x Other\_x (Var\_B\_37\_h\_x)*****If Other has been selected, please explain in more detail:*****(Text)****38. Which information on origin is available in connection with the information on infections/sampling/controls?**

- |                                                                                         |                                                               |
|-----------------------------------------------------------------------------------------|---------------------------------------------------------------|
| <input type="checkbox"/> Sampling location (Var_B_38_a)                                 | <input type="checkbox"/> Laboratory (Var_B_38_f)              |
| <input type="checkbox"/> Location of the diseased animal (Var_B_38_b)                   | <input type="checkbox"/> No indication of origin (Var_B_38_g) |
| <input type="checkbox"/> Operating/Company location or processing location (Var_B_38_c) | <input type="checkbox"/> Slaughterhouse (Var_B_38_h)          |
| <input type="checkbox"/> Place of residence of the patient (Var_B_38_d)                 | <input type="checkbox"/> Responsible office (Var_B_38_i)      |
| <input type="checkbox"/> Hospital (Var_B_38_e)                                          | <input type="checkbox"/> Other (Var_B_38_j)                   |

38.x Other\_x (Var\_B\_38\_j\_x)

***If Other has been selected, please explain in more detail:***

***(Text)***

39. Which geographical information is available in the individual data set?

☐ GIS information (Var\_B\_39\_a)

☐ Office identifier (Var\_B\_39\_f)

☐ Address (Var\_B\_39\_b)

☐ License plate number (Var\_B\_39\_g)

☐ VVVO-Number (Var\_B\_39\_c)

☐ Municipality code number (Var\_B\_39\_h)

☐ Zip code (without further address details) (Var\_B\_39\_d)

☐ No geographical information (Var\_B\_39\_i)

☐ County (without further address details) (Var\_B\_39\_e)

☐ Other (Var\_B\_39\_j)

39.x Other\_x (Var\_B\_39\_j\_x)

***If Other has been selected, please explain in more detail:***

***(Text)***

40. Is the place of origin described in more detail? (e.g. type of operation, hospital ward)

(Var\_C\_44)

☐ Yes

☐ No

☐ Yes partially

☐ No information

## Relation

41. For what period of time is the above information available? (In relation to the pathogen or the disease/sampling/controls)

41.a From

(Var\_B\_41\_a)

(DD.MM.YYYY)

41.b To (if consecutive do not enter anything)

(Var\_B\_41\_b)

(DD.MM.YYYY)

42. For which geographical area is data available in the data collection?

Specify all existing levels.

☐ State (Var\_B\_42\_a)

☐ Administrative district (county) (Var\_B\_42\_d)

☐ Federal state (Var\_B\_42\_b)

☐ Municipality (Var\_B\_42\_e)

☐ Other (Var\_B\_42\_c)

42.x Other\_x (Var\_B\_42\_e\_x)

***If Other was selected, please explain in more detail:***

**(Text)**

43. What is the lowest aggregation level for which data is available?

(Var\_B\_43)

☐ Isolat (pathogen)

☐ Plant

☐ Sample

☐ Hospital

☐ Individual (case-based)

☐ City

☐ Outbreake

☐ Municipality

☐ Household

☐ District

☐ Group of animals

☐ Federal state

☐ Batch

☐ Nation

☐ Product group

☐ No information

☐ Stock☐ Other

43.x Other\_x (Var\_B\_43\_x)

**If Other has been selected, please explain in more detail:****(Text)**

44. Is there sampling plan for this type of infection data?

(Var\_B\_44)

☐ Yes☐ No☐ No information

45. Who is involved in collecting the data (sampling and reporting)?

☐ Department/Office (Var\_B\_45\_a)☐ Laboratory (Var\_B\_45\_e)☐ Healthcare professionals (Var\_B\_45\_b)☐ Private individual (Var\_B\_45\_f)☐ Farmers/producers (Var\_B\_45\_c)☐ No information (Var\_B\_45\_g)☐ Private company (Var\_B\_45\_d)☐ Other (Var\_B\_45\_h)

45.x Other\_x (Var\_B\_45\_h\_x)

**If Other has been selected, please explain in more detail:****(Text)**

46. Has the data collected in the collection been processed in any way that would be relevant for secondary data use?

☐ No (Var\_B\_46\_a)☐ Additional data selection and reduction (Var\_B\_46\_e)☐ Pseudonymization (Var\_B\_46\_b)☐ Weighting (Var\_B\_46\_f)☐ Anonymization (Var\_B\_46\_c)☐ No information (Var\_B\_46\_g)☐ Summarizing detailed data  
to larger units (Var\_B\_46\_d)☐ Other (Var\_B\_46\_h)

46.x Other\_x (Var\_B\_46\_h\_x)

**If Other has been selected, please explain in more detail:****(Text)**

---

47. How quickly is the data available in the data collection after it has been entered into the data collection?

☐ Real time (*Var\_b\_47\_a*)

☐ Quarterly (*Var\_b\_47\_f*)

☐ Daily (*Var\_b\_47\_b*)

☐ Half-yearly (*Var\_b\_47\_g*)

☐ Weekly (*Var\_b\_47\_c*)

☐ Annually (*Var\_b\_47\_h*)

☐ Fortnightly (*Var\_b\_47\_d*)

☐ No information (*Var\_b\_47\_i*)

☐ Monthly (*Var\_b\_47\_e*)

☐ Other (*Var\_b\_47\_j*)

**47.x Other\_x (*Var\_b\_47\_j\_x*)**

***If Other has been selected, please explain in more detail:***

**(Text)**

---

48. Why was the information on the pathogen or disease not fully recorded, or why can the pathogen or disease not be included in the analysis?

(*Var\_B\_48*)

**(Text)**

49. Explanation of systematic errors and data accuracy

(*Var\_B\_49*)



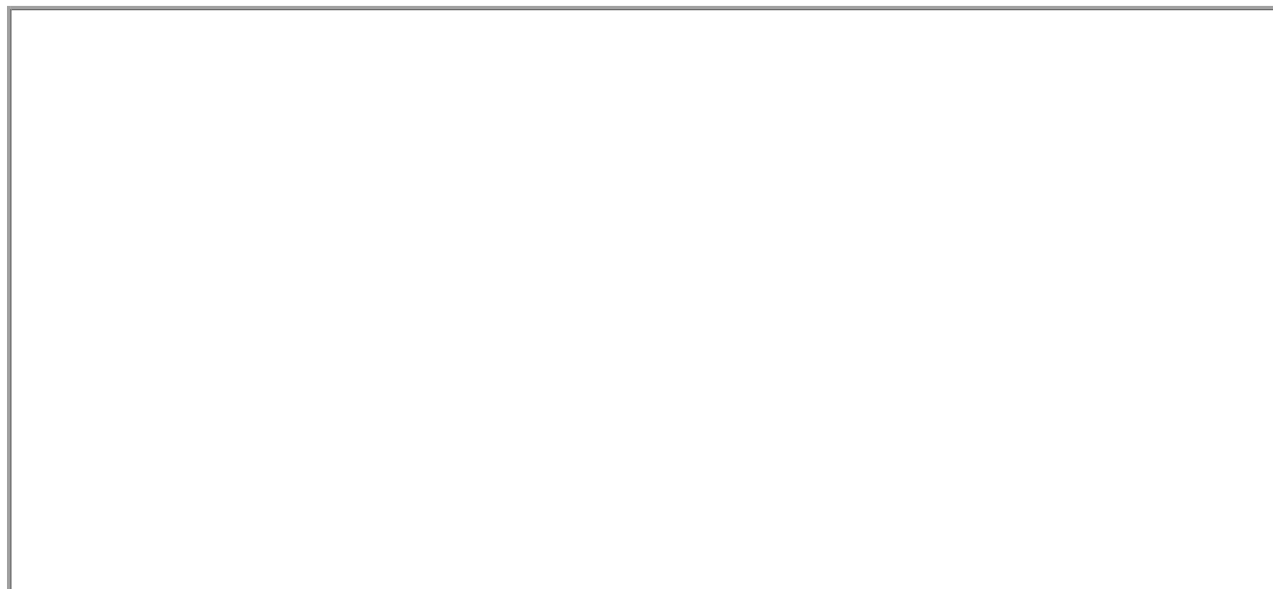*(Text)*

50. Other comments and notes that have not yet been recorded (*Var\_B\_50*)

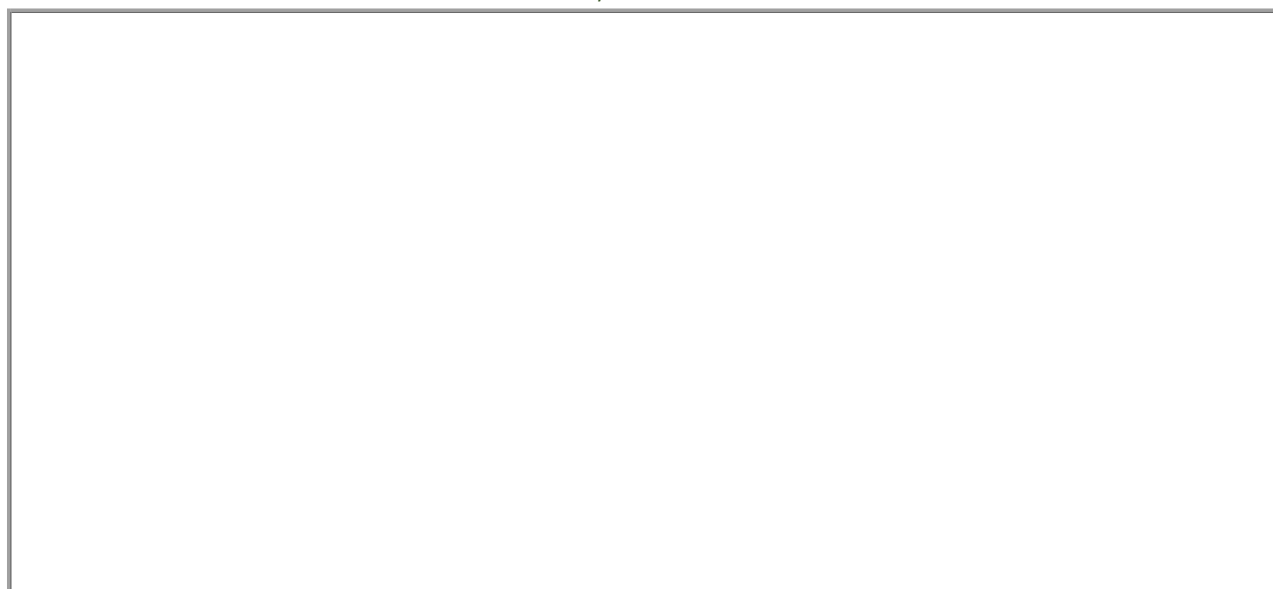*(Text)*

---
