# Supplementary material
Source: MDPI journal article supplement (https://www.mdpi.com/2813-0227/4/1/7)
Supplement: s1 [file s1]

## Inhalt

|                                                                                                                                                                            |    |
|----------------------------------------------------------------------------------------------------------------------------------------------------------------------------|----|
| Inhalt .....                                                                                                                                                               | 1  |
| Ausfüllhinweise .....                                                                                                                                                      | 4  |
| 0 Vorabinformationen .....                                                                                                                                                 | 5  |
| 1. ID DB .....                                                                                                                                                             | 5  |
| 2. Datum .....                                                                                                                                                             | 5  |
| A Datenbankattribute.....                                                                                                                                                  | 5  |
| A.1 Allgemeine Informationen .....                                                                                                                                         | 5  |
| 3. Wie lautet der offizielle Name der Datenquelle? .....                                                                                                                   | 5  |
| 4. Welche Institution ist hauptverantwortlich für die Datenquelle? .....                                                                                                   | 7  |
| 5. Für welche Populationen ist eine Datenerfassung in der Datenquelle vorgesehen? .....                                                                                    | 7  |
| 6. Für welche Zwecke werden die Daten erhoben? .....                                                                                                                       | 7  |
| 7. Auf welcher Ebene werden die Daten (primär) erhoben? .....                                                                                                              | 8  |
| 8. Wie viele Datensätze werden durchschnittlich innerhalb eines Jahres in der Datenquelle abgelegt?<br>(Durchschnitt der letzten 3 Vorjahre, ohne das laufende Jahr) ..... | 8  |
| 9. Woher stammen die Mittel zur Finanzierung der Datenquelle überwiegend? .....                                                                                            | 8  |
| A.2 Qualität .....                                                                                                                                                         | 9  |
| 10. Erfolgt die Stichprobenauswahl standardisiert? .....                                                                                                                   | 9  |
| 11. Erfolgt die Datenerhebung standardisiert? .....                                                                                                                        | 9  |
| A.3 Dokumentation .....                                                                                                                                                    | 10 |
| 12. Erfolgt eine Dokumentation der Stichprobenauswahl? .....                                                                                                               | 10 |
| 13. Erfolgt eine Dokumentation der Datenbearbeitung? .....                                                                                                                 | 10 |
| 14. Werden Änderungen von Variablendefinitionen oder Änderungen in der Vorgehensweise dokumentiert? .....                                                                  | 10 |
| A.4 Datenprüfung und -veröffentlichung .....                                                                                                                               | 12 |
| 15. Erfolgt ein Originaldatenabgleich, d.h. eine Überprüfung der Übereinstimmung der Datenelemente mit<br>Originaldaten durch eine Stichprobe? .....                       | 12 |
| 16. Erfolgt eine Veröffentlichung der Daten? .....                                                                                                                         | 12 |
| 17. Fließen die Daten in regelmäßige Berichte ein? .....                                                                                                                   | 12 |
| A.5 Zugriff .....                                                                                                                                                          | 13 |
| 18. Wer sollte bei Fragen bezüglich der Datenquelle kontaktiert werden (z.B. Dezernat)? .....                                                                              | 13 |
| 19. Inwiefern ist allgemein ein Zugriff auf Daten möglich (ggf. aggregiert)? Ist Folgendes erlaubt: .....                                                                  | 13 |
| 20. Falls vorhanden, wie lautet die Web-Adresse für den Daten-Export/Zugriff? .....                                                                                        | 13 |
| A.6 Technische Daten .....                                                                                                                                                 | 14 |
| 21. Um welchen Quelldatentyp handelt es sich? .....                                                                                                                        | 14 |

|                                                                                                                                                                                            |           |
|--------------------------------------------------------------------------------------------------------------------------------------------------------------------------------------------|-----------|
| 22. Was ist clientseitig nötig, um auf die Datenquelle zugreifen zu können? (Webanwendung, Programm, etc.) .....                                                                           | 14        |
| 23. In welchen Formaten können Daten exportiert werden? .....                                                                                                                              | 14        |
| 24. Warum wurden die Angaben zur Datenquelle nicht vollständig erfasst bzw. warum kann die Datenquelle nicht in die Analyse einbezogen werden? .....                                       | 15        |
| 25. Sonstige Kommentare und Hinweise, welche bisher nicht erfasst wurden .....                                                                                                             | 15        |
| <b>B Erreger bzw. Erkrankung .....</b>                                                                                                                                                     | <b>16</b> |
| Datenart .....                                                                                                                                                                             | 16        |
| 26. Bezeichnung des Erregers oder der Erkrankung .....                                                                                                                                     | 16        |
| 27. Wie viele Datensätze werden durchschnittlich innerhalb eines Jahres zu diesem Erreger in der Datenquelle abgelegt? (Durchschnitt der letzten 3 Vorjahre, ohne das laufende Jahr) ..... | 16        |
| 28. Für welche Populationen werden Daten zu diesem Erreger/dieser Erkrankung erfasst? .....                                                                                                | 16        |
| 29. Kommentar Einschränkungen zur Population .....                                                                                                                                         | 17        |
| 30. Wichtige zugrundeliegende Rechtsnorm der Datenerfassung .....                                                                                                                          | 17        |
| 31. Aus welcher Art der Datensammlung stammen die Informationen? .....                                                                                                                     | 17        |
| 32. Wurde für diesen Erreger/diese Erkrankung eine Falldefinition/Grenzwerte/Kriterien/etc. festgelegt? .....                                                                              | 18        |
| 33. Welche Informationen liegen in den Daten zu dem betreffenden Erreger bzw. der Erkrankung vor (unabhängig davon, ob vollständig oder nicht)? .....                                      | 18        |
| 34. Welche Angaben zur Spezifikation des Erregers (z.B. Genus, Spezies, Subspezies) sind vorhanden? .....                                                                                  | 19        |
| 35. Werden Angaben zur Probenmatrix (Probenmaterial) aufgenommen? .....                                                                                                                    | 19        |
| 36. Welches Material wird untersucht? .....                                                                                                                                                | 20        |
| 37. Welche Zeitangaben sind im Zusammenhang mit den Informationen zu Infektionen/Beprobung/Kontrollen vorhanden? .....                                                                     | 20        |
| 38. Welche Herkunftsangaben sind im Zusammenhang mit den Informationen zu Infektionen/Beprobungen/Kontrollen vorhanden? .....                                                              | 20        |
| 39. Welche geographischen Angaben zur Herkunftsangabe sind im einzelnen Datensatz vorhanden? .....                                                                                         | 21        |
| 40. Ist der Herkunftsort näher beschrieben? (z.B. Betriebsart, Krankenhausstation) .....                                                                                                   | 21        |
| Bezug .....                                                                                                                                                                                | 22        |
| 41. Für welchen Zeitraum sind die genannten Informationen erhältlich? (Bezogen auf den Erreger bzw. die Erkrankung/Beprobungen/Kontrollen) .....                                           | 22        |
| 42. Für welchen geographischen Bereich sind in der Datenquelle Daten vorhanden? .....                                                                                                      | 22        |
| Alle vorhandenen Ebenen angeben .....                                                                                                                                                      | 22        |
| 43. Was ist das niedrigste Aggregationslevel, für welches Daten zur Verfügung stehen? .....                                                                                                | 22        |
| 45. Wer ist an der Erhebung der Daten beteiligt (Beprobung und Befundung)? .....                                                                                                           | 23        |
| 46. Wurden die in der Quelle enthaltenen Daten in irgendeiner Form bearbeitet, die hinsichtlich einer sekundären Nutzung relevant wären? .....                                             | 23        |
| 47. Wie schnell liegen die Daten in der Datenquelle vor, nachdem sie in die Datenquelle eingetragen wurden? .....                                                                          | 24        |

|                                                                                                                                                                                       |    |
|---------------------------------------------------------------------------------------------------------------------------------------------------------------------------------------|----|
| 48. Warum wurden die Angaben zum Erreger bzw. die Erkrankung nicht vollständig erfasst, bzw. warum kann der Erreger oder die Erkrankung nicht in die Analyse einbezogen werden? ..... | 24 |
| 49. Erläuterung zu systematischen Fehlern und Datengenauigkeit.....                                                                                                                   | 25 |
| 50. Sonstige Kommentare und Hinweise, welche bisher nicht erfasst wurden .....                                                                                                        | 25 |
| C Beschreibung einzelner Variablen .....                                                                                                                                              | 26 |

## Ausfüllhinweise

**Textfeld:** für Freitextfelder

 (Text/Zahl)

In Textfeldern kann ein Absatz mit STRG + Enter eingefügt werden.

**Textfeld:** für Datumseingaben nach dem Format DD.MM.JJJJ

 (DD.MM.JJJJ)

**Mehrfachoptionsfeld:** Ein oder mehrere Häkchen können gesetzt werden

☒ Option1

☒ Option2

**Einfachoptionsfeld:** Es kann immer nur 1 Option selektiert werden

☐ Option1    ☒ Option2

**Bedingtes Feld (eingerückt):** eine vorherige Option einer anderen Frage muss gewählt werden

X.x Andere\_x

**Wenn Andere angekreuzt wurde, dann bitte näher erläutern:**

 (Text)

---

## 0 Vorabinformationen

### 1. ID DB

(Datenquelle\_ID)

(Text)

### 2. Datum

(Datum)

Beginn der Aufnahme von Informationen zur Datenquelle.

(DD.MM.JJJJ)

---

## A Datenbankattribute

### A.1 Allgemeine Informationen

Als erstes werden einige Informationen erhoben, welche die Datenquelle allgemein beschreiben.

#### 3. Wie lautet der offizielle Name der Datenquelle?

(VAR\_A\_3)

(Text)

#### 3.a Wie lautet die Kurzbezeichnung der Datenquelle? (VAR\_A\_3\_a)

(Text)

#### 3.b Ist die Datenquelle erregerezentriert?

(VAR\_A\_3\_b)

☐ Ja

☐ Nein

☐ Nicht bekannt

3.b.1 Wenn nein ausgewählt wurde: Enthält die Datenquelle Informationen zu folgenden Bereichen?

☐ Antibiotika-/Arzneimiteleinsatz

☐ Umwelt

☐ Futtermittel

☐ Andere

3.b.1.x Andere\_x

Wenn Andere angekreuzt wurde, dann bitte näher erläutern:

(Text)

### 3.c Hintergrund der Datenerfassung und kurze Beschreibung der Datenquelle

(VAR\_A\_3\_c)

(Text)

### 3.d Link / Quelle / URL und 3.e letzter Zugriff

| Link/Quelle/URL (VAR_A_3_d_1 - VAR_A_3_d_4)(Text) | Letzter Zugriff (VAR_A_3_e_1 - VAR_A_3_e_4)<br>(DD.MM.JJJJ) |
|---------------------------------------------------|-------------------------------------------------------------|
|                                                   |                                                             |
|                                                   |                                                             |
|                                                   |                                                             |
|                                                   |                                                             |
|                                                   |                                                             |
|                                                   |                                                             |
|                                                   |                                                             |
|                                                   |                                                             |

4. Welche Institution ist hauptverantwortlich für die Datenquelle?

(VAR\_A\_4)

(Text)

5. Für welche Populationen ist eine Datenerfassung in der Datenquelle vorgesehen?

- |                                                                        |                                                    |
|------------------------------------------------------------------------|----------------------------------------------------|
| <input type="checkbox"/> Mensch (Var_A_5_a)                            | <input type="checkbox"/> Futtermittel (Var_A_5_f)  |
| <input type="checkbox"/> Haustier (Var_A_5_b)                          | <input type="checkbox"/> Umwelt (Var_A_5_g)        |
| <input type="checkbox"/> Wildtier (Var_A_5_c)                          | <input type="checkbox"/> Keine Angaben (Var_A_5_h) |
| <input type="checkbox"/> Tier (falls nicht spezifizierbar) (Var_A_5_d) | <input type="checkbox"/> Andere (Var_A_5_i)        |
| <input type="checkbox"/> Lebensmittel (Var_A_5_e)                      |                                                    |

5.x Andere\_x (Var\_A\_5\_i\_x)

**Wenn Andere angekreuzt wurde, dann bitte näher erläutern:**

(Text)

6. Für welche Zwecke werden die Daten erhoben?

- ☐ Vorhersage von (Krankheits-)Ausbrüchen (Var\_A\_6\_a)
- ☐ Identifikation von Ausbrüchen oder ungewöhnliche Cluster (Var\_A\_6\_b)
- ☐ Monitoring des Gesundheitsstatus einer Population (Var\_A\_6\_c)
- ☐ Auffinden seltener Krankheitsfälle (Var\_A\_6\_d)
- ☐ Identifikation von Risikofaktoren (Var\_A\_6\_e)
- ☐ Nachweis von Freiheit von einer bestimmten Erkrankung bzw. Resistenz (Var\_A\_6\_f)
- ☐ Evaluation von Präventions-, Behandlungs- oder Kontrollmaßnahmen (Var\_A\_6\_g)
- ☐ Rückverfolgung einer Infektion (Tracing) (Var\_A\_6\_h)
- ☐ Verfolgung der Verbreitung einer Infektion (Tracking) (Var\_A\_6\_i)
- ☐ Verbesserung des epidemiologischen Wissens bezüglich einer Krankheit (Var\_A\_6\_j)
- ☐ Gesundheitsökonomische Analysen (Var\_A\_6\_k)
- ☐ Sicherstellung der Unbedenklichkeit der vom Tier gewonnenen Lebensmittel (Var\_A\_6\_m)
- ☐ Verhinderung des Eintrags in die Lebensmittelkette aus Umwelt über Futtermittel oder Lebensmittel (Var\_A\_6\_n)

☐ Keine Angaben (Var\_A\_6\_l)☐ Andere (Var\_A\_6\_o)**6.x Andere\_x (Var\_A\_6\_o\_x)****Wenn Andere angekreuzt wurde, dann bitte näher erläutern:**

(Text)

7. Auf welcher Ebene werden die Daten (primär) erhoben?

(Var\_A\_7)

Erläuterung: Ein Datensatz bzw. eine Zeile in der Datenquelle beschreibt z.B. einen Fall, eine Probe, ein Tier ....

(Text)

8. Wie viele Datensätze werden durchschnittlich innerhalb eines Jahres in der Datenquelle abgelegt?

(Durchschnitt der letzten 3 Vorjahre, ohne das laufende Jahr)

(Var\_A\_8)

(Zahl)

8.a Erläuterung zur Anzahl der Datensätze: (Var\_A\_8\_a)

(Text)

9. Woher stammen die Mittel zur Finanzierung der Datenquelle überwiegend?

(Var\_A\_9)

☐ öffentlicher Sektor☐ Mitgliederbeiträge☐ privater Sektor☐ Keine Angaben☐ Wohltätigkeitsorganisation☐ Andere**9.x Andere\_x (Var\_A\_9\_x)****Wenn Andere angekreuzt wurde, dann bitte näher erläutern:**

(Text)



## A.2 Qualität

Es folgen einige Fragen zur Standardisierung und Dokumentation der aufgenommenen Informationen sowie einige Angaben zur Qualitätssicherung.

### Definition:

**Standardisierung:** Erfolgen die folgenden Arbeitsschritte standardisiert, d.h. existieren Vorgaben wie sie zu erfolgen haben und werden diese Vorgaben befolgt?

10. Erfolgt die Stichprobenauswahl standardisiert?

(Var\_A\_10)

- |                                      |                                        |
|--------------------------------------|----------------------------------------|
| <input type="radio"/> Ja vollständig | <input type="radio"/> Nein             |
| <input type="radio"/> Ja teilweise   | <input type="radio"/> Keine Angaben    |
| <input type="radio"/> Andere         | <input type="radio"/> Nicht zutreffend |

10.x Andere\_x (Var\_A\_10\_x)

**Wenn Andere angekreuzt wurde, dann bitte näher erläutern:**

(Text)

11. Erfolgt die Datenerhebung standardisiert?

(Var\_A\_11)

- |                                      |                                     |
|--------------------------------------|-------------------------------------|
| <input type="radio"/> Ja vollständig | <input type="radio"/> Nein          |
| <input type="radio"/> Ja teilweise   | <input type="radio"/> Keine Angaben |
| <input type="radio"/> Andere         |                                     |

11.x Andere\_x (Var\_A\_11\_x)

**Wenn Andere angekreuzt wurde, dann bitte näher erläutern:**

(Text)

## A.3 Dokumentation

Zur Dokumentation der Vorgehensweise: Werden die folgenden Vorgänge dokumentiert, d.h. festgehalten wie, durch wen, wann eine Dokumentation erfolgt?

12. Erfolgt eine Dokumentation der Stichprobenauswahl?

(Var\_A\_12)

- |                                      |                                        |
|--------------------------------------|----------------------------------------|
| <input type="radio"/> Ja vollständig | <input type="radio"/> Nein             |
| <input type="radio"/> Ja teilweise   | <input type="radio"/> Keine Angaben    |
| <input type="radio"/> Andere         | <input type="radio"/> Nicht zutreffend |

12.x Andere\_x (Var\_A\_12\_x)

**Wenn Andere angekreuzt wurde, dann bitte näher erläutern:**

(Text)

13. Erfolgt eine Dokumentation der Datenbearbeitung?

(Var\_A\_13)

- |                                      |                                     |
|--------------------------------------|-------------------------------------|
| <input type="radio"/> Ja vollständig | <input type="radio"/> Nein          |
| <input type="radio"/> Ja teilweise   | <input type="radio"/> Keine Angaben |
| <input type="radio"/> Andere         |                                     |

13.x Andere\_x (Var\_A\_13\_x)

**Wenn Andere angekreuzt wurde, dann bitte näher erläutern:**

(Text)

14. Werden Änderungen von Variablendefinitionen oder Änderungen in der Vorgehensweise dokumentiert?

(Var\_A\_14)

- |                                      |                                     |
|--------------------------------------|-------------------------------------|
| <input type="radio"/> Ja vollständig | <input type="radio"/> Nein          |
| <input type="radio"/> Ja teilweise   | <input type="radio"/> Keine Angaben |
| <input type="radio"/> Andere         |                                     |

14.x Andere\_x (Var\_A\_14\_x)

**Wenn Andere angekreuzt wurde, dann bitte näher erläutern:**

(Text)

---

A.4 Datenprüfung und -veröffentlichung

Welche Prüfungen erfolgen, um fehlerhafte Werte in der Datenquelle zu vermeiden? (Angabe „Ja systematisch“ wenn dies im Arbeitsprozess fest verankert ist und in bestimmten Abständen erfolgt)

15. Erfolgt ein Originaldatenabgleich, d.h. eine Überprüfung der Übereinstimmung der Datenelemente mit Originaldaten durch eine Stichprobe?

(Var\_A\_15)

- ☐ Ja systematisch ☐ Nein  
☐ Ja nicht systematisch ☐ Keine Angaben

16. Erfolgt eine Veröffentlichung der Daten?

(Var\_A\_16)

- ☐ Ja vollständig ☐ Nein  
☐ Ja teilweise ☐ Keine Angaben

17. Fließen die Daten in regelmäßige Berichte ein?

(Var\_A\_17)

- ☐ Ja ☐ Nein  
☐ Keine Angaben

17. Welche Berichte (ggf. URL/DOI)

**Wenn Frage 17 = ja angekreuzt wurde, dann bitte näher erläutern:**

(VAR\_A\_17\_a\_1 - VAR\_A\_17\_a\_4)

(VAR\_A\_17\_b\_1 - VAR\_A\_17\_b\_4)

| Link/Quelle/URL (Text) | Letzter Zugriff (DD.MM.JJJJ) |
|------------------------|------------------------------|
|                        |                              |
|                        |                              |
|                        |                              |
|                        |                              |
|                        |                              |

## A.5 Zugriff

Es folgen einige Fragen, ob und inwiefern ein Zugriff auf die Informationen überhaupt möglich ist.

18. Wer sollte bei Fragen bezüglich der Datenquelle kontaktiert werden (z.B. Dezernat)?

(Var\_A\_18)

(Text)

19. Inwiefern ist allgemein ein Zugriff auf Daten möglich (ggf. aggregiert)? Ist Folgendes erlaubt:

☐ Lesen öffentlich (Var\_A\_19\_a)

☐ Datenexport/Nutzung auf Anfrage (Var\_A\_19\_d)

☐ Datenexport/Nutzung öffentlich (Var\_A\_19\_b)

☐ Zugriff gesperrt (Var\_A\_19\_e)

☐ Lesen auf Anfrage (Var\_A\_19\_c)

☐ Keine Angaben (Var\_A\_19\_f)

20. Falls vorhanden, wie lautet die Web-Adresse für den Daten-Export/Zugriff?

(Var\_A\_20)

(Text)

20.a Falls vorhanden, wann war der letzte Zugriff?

(Var\_A\_20\_a)

(DD.MM.JJJJ)

## A.6 Technische Daten

Nun geht es um einige grundlegende technische Aspekte zur Beschreibung der Datenquelle.

21. Um welchen Quelldatentyp handelt es sich?

- |                                                          |                                                              |
|----------------------------------------------------------|--------------------------------------------------------------|
| <input type="checkbox"/> Datenbank ( <i>Var_A_28_a</i> ) | <input type="checkbox"/> JSON ( <i>Var_A_28_d</i> )          |
| <input type="checkbox"/> CSV ( <i>Var_A_28_b</i> )       | <input type="checkbox"/> Keine Angaben ( <i>Var_A_28_e</i> ) |
| <input type="checkbox"/> XML ( <i>Var_A_28_c</i> )       | <input type="checkbox"/> Andere ( <i>Var_A_28_f</i> )        |

21.x Andere\_x (*Var\_A\_28\_f\_x*)

**Wenn Andere angekreuzt wurde, dann bitte näher erläutern:**

(Text)

22. Was ist clientseitig nötig, um auf die Datenquelle zugreifen zu können? (Webanwendung, Programm, etc.)

(*Var\_A\_22*)

(Text)

23. In welchen Formaten können Daten exportiert werden?

- |                                                      |                                                              |
|------------------------------------------------------|--------------------------------------------------------------|
| <input type="checkbox"/> Excel ( <i>Var_A_23_a</i> ) | <input type="checkbox"/> Keine Angaben ( <i>Var_A_23_d</i> ) |
| <input type="checkbox"/> CSV ( <i>Var_A_23_b</i> )   | <input type="checkbox"/> Andere ( <i>Var_A_23_e</i> )        |
| <input type="checkbox"/> PDF ( <i>Var_A_23_c</i> )   |                                                              |

23.x Andere\_x (*Var\_A\_23\_e\_x*)

**Wenn Andere angekreuzt wurde, dann bitte näher erläutern:**

(Text)

24. Warum wurden die Angaben zur Datenquelle nicht vollständig erfasst bzw. warum kann die Datenquelle nicht in die Analyse einbezogen werden?

(Var\_A\_24)

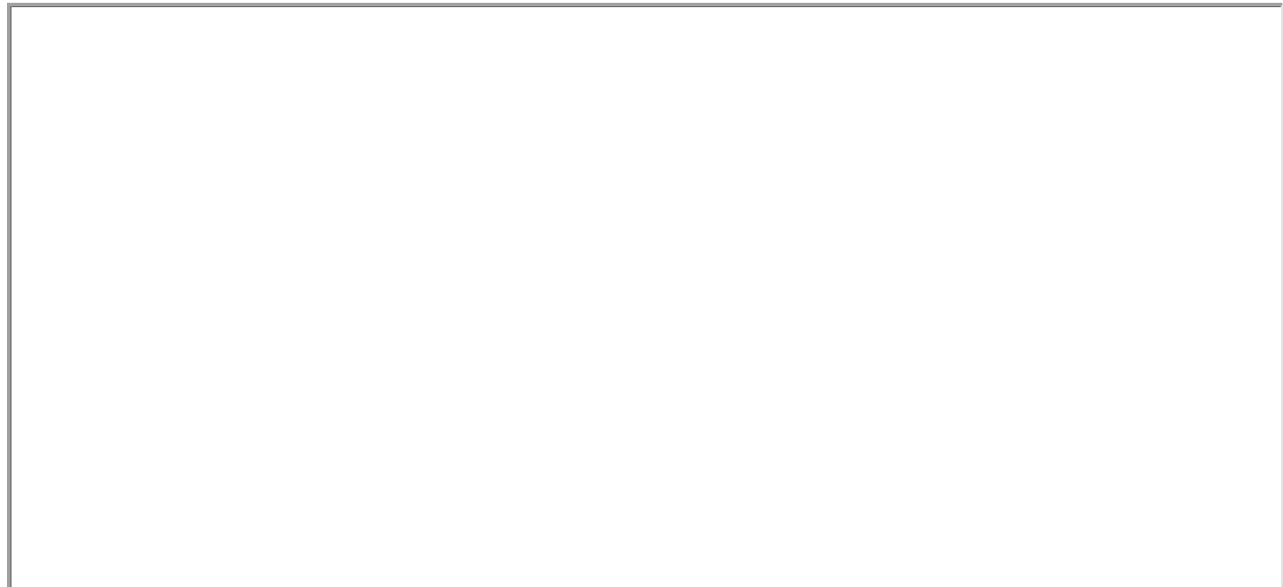

(Text)

25. Sonstige Kommentare und Hinweise, welche bisher nicht erfasst wurden

(Var\_A\_25)



(Text)

## B Erreger bzw. Erkrankung

Jeweils auszufüllen für die in der Datenquelle vorkommenden Erreger bzw. Erkrankungen.

Datenart

26. Bezeichnung des Erregers oder der Erkrankung

(Var\_B\_26)

(Text)

26.a Ist der Erreger eine Zoonose?

(Var\_B\_26\_a)

☐ Ja ☐ Nein ☐ Nicht bekannt

26.b Werden für diesen Erreger Empfindlichkeitsprüfungen durchgeführt?

(Var\_B\_26\_b)

☐ Ja ☐ Nein ☐ Nicht bekannt

27. Wie viele Datensätze werden durchschnittlich innerhalb eines Jahres zu diesem Erreger in der Datenquelle abgelegt? (Durchschnitt der letzten 3 Vorjahre, ohne das laufende Jahr)

(Var\_B\_27)

(Zahl)

27.a Erläuterung zur Anzahl der Datensätze:

(Var\_B\_27\_a)

(Text)

28. Für welche Populationen werden Daten zu diesem Erreger/dieser Erkrankung erfasst?

- |                                                                         |                                                     |
|-------------------------------------------------------------------------|-----------------------------------------------------|
| <input type="checkbox"/> Mensch (Var_B_28_a)                            | <input type="checkbox"/> Futtermittel (Var_B_28_f)  |
| <input type="checkbox"/> Haustier (Var_B_28_b)                          | <input type="checkbox"/> Umwelt (Var_B_28_g)        |
| <input type="checkbox"/> Wildtier (Var_B_28_c)                          | <input type="checkbox"/> Keine Angaben (Var_B_28_h) |
| <input type="checkbox"/> Tier (falls nicht spezifizierbar) (Var_B_28_d) | <input type="checkbox"/> Andere (Var_B_28_i)        |
| <input type="checkbox"/> Lebensmittel (Var_B_28_e)                      |                                                     |



28.x Andere\_x (Var\_B\_28\_i\_x)

**Wenn Andere angekreuzt wurde, dann bitte näher erläutern:**

(Text)

29. Kommentar Einschränkungen zur Population

(Var\_B\_29)

(Text)

30. Wichtige zugrundeliegende Rechtsnorm der Datenerfassung

(Var\_B\_30)

(Text)

31. Aus welcher Art der Datensammlung stammen die Informationen?

- |                                                                            |                                                                                      |
|----------------------------------------------------------------------------|--------------------------------------------------------------------------------------|
| <input type="checkbox"/> Survey (Var_B_31_a)                               | <input type="checkbox"/> Sonstige Fallmeldungen (freiwillig/verpflich.) (Var_B_31_g) |
| <input type="checkbox"/> Monitoring (Bsp. AVV ZoonoseLMkette) (Var_B_31_b) | <input type="checkbox"/> Register (Var_B_31_h)                                       |
| <input type="checkbox"/> Sentinel (Var_B_31_c)                             | <input type="checkbox"/> Mortalitätsstatistik (Var_B_31_i)                           |
| <input type="checkbox"/> Amtliche Beprobung (Var_B_31_d)                   | <input type="checkbox"/> Zensus (Var_B_31_j)                                         |
| <input type="checkbox"/> Erhebung von ÄrztInnen (Var_B_31_e)               | <input type="checkbox"/> Keine Angaben (Var_B_31_k)                                  |
| <input type="checkbox"/> Fallmeldung nach IfSG, TSG (Var_B_31_f)           | <input type="checkbox"/> Andere (Var_B_31_l)                                         |

31.x Andere\_x (Var\_B\_31\_l\_x)

**Wenn Andere angekreuzt wurde, dann bitte näher erläutern:**

(Text)

32. Wurde für diesen Erreger/diese Erkrankung eine Falldefinition/Grenzwerte/Kriterien/etc. festgelegt?  
(Var\_B\_32)

Bsp Falldefinition.: [https://www.rki.de/DE/Content/Infekt/IfSG/Falldefinition/falldefinition\\_node.html](https://www.rki.de/DE/Content/Infekt/IfSG/Falldefinition/falldefinition_node.html)

☐ Ja ☐ Nein ☐ Keine Angaben ☐ Nicht zutreffend

32a. Wenn ja, wie lautet die Falldefinition/Grenzwerte/Kriterien/etc.? (Var\_B\_32\_a)

(Text)

33. Welche Informationen liegen in den Daten zu dem betreffenden Erreger bzw. der Erkrankung vor  
(unabhängig davon, ob vollständig oder nicht)?

- ☐ Fallmeldung (Var\_B\_33\_a)
- ☐ Verdachtsmeldung (Erreger oder Erkrankung nicht bestätigt) (Var\_B\_33\_b)
- ☐ Probenergebnis (labordiagnostischer Nachweis von Krankheitserregern) (Var\_B\_33\_c)
- ☐ Erregernachweis (kulturell o. PCR) (Var\_B\_33\_d)
- ☐ Sequenzierung (Var\_B\_33\_e)
- ☐ Ag Nachweis (z.B. ELISA) (Var\_B\_33\_f)
- ☐ Ak Nachweis (Var\_B\_33\_g)
- ☐ Gesundheitsstatus (ohne Probe/Untersuchung) (Var\_B\_33\_h)
- ☐ Untersuchungsergebnis (anhand des Krankheitsbildes durch medizinisches/tiermedizinisches Fachpersonal, z.B. Test, klinischer Befund) (Var\_B\_33\_i)
- ☐ Diagnose (Var\_B\_33\_j)
- ☐ Sektion/Autopsie (Var\_B\_33\_k)
- ☐ Testergebnis (sonstige) (Var\_B\_33\_l)
- ☐ Keine Angaben (Var\_B\_33\_m)

☐ Andere (Var\_C\_36\_n)

33.x Andere\_x (Var\_B\_33\_n\_x)

**Wenn Andere angekreuzt wurde, dann bitte näher erläutern:**

(Text)

34. Welche Angaben zur Spezifikation des Erregers (z.B. Genus, Spezies, Subspezies) sind vorhanden?

☐ Genus (Var\_B\_34\_a)

☐ Serovar/-typ (Var\_B\_34\_d)

☐ Spezies (Var\_B\_34\_b)

☐ Keine Angaben (Var\_B\_34\_e)

☐ Subspezies (Var\_B\_34\_c)

☐ Andere (Var\_B\_34\_f)

34.x Andere\_x (Var\_B\_34\_f\_x)

**Wenn Andere angekreuzt wurde, dann bitte näher erläutern:**

(Text)

35. Werden Angaben zur Probenmatrix (Probenmaterial) aufgenommen?

(Var\_B\_35)

☐ Ja

☐ Nein

☐ Keine Angaben

35.a Weitere Kommentare zur Probenmatrix

(Text)

**36. Welches Material wird untersucht?****Wenn Frage 35 = Ja angekreuzt wurde, dann bitte näher erläutern:**

- |                                                    |                                                                                              |
|----------------------------------------------------|----------------------------------------------------------------------------------------------|
| <input type="checkbox"/> Blut/Serum (Var_B_36_a)   | <input type="checkbox"/> Fleisch (Var_B_36_g)                                                |
| <input type="checkbox"/> Stuhl/Kot (Var_B_36_b)    | <input type="checkbox"/> Umgebungsproben (nicht von Individuen/<br>Kontaktpers.) Var_B_36_h) |
| <input type="checkbox"/> Urin (Var_B_36_c)         | <input type="checkbox"/> Futtermittel (Var_B_36_i)                                           |
| <input type="checkbox"/> Lebensmittel (Var_B_36_d) | <input type="checkbox"/> unterschiedlich (Var_B_36_j)                                        |
| <input type="checkbox"/> Milch (Var_B_36_e)        | <input type="checkbox"/> Keine Angaben (Var_B_36_k)                                          |
| <input type="checkbox"/> Gewebeprobe (Var_B_36_f)  | <input type="checkbox"/> Andere (Var_B_36_k)                                                 |

**36.x Andere\_x (Var\_B\_36\_l\_x)****Wenn Andere angekreuzt wurde, dann bitte näher erläutern:****(Text)****37. Welche Zeitangaben sind im Zusammenhang mit den Informationen zu Infektionen/Beprobung/Kontrollen vorhanden?**

- |                                                               |                                                        |
|---------------------------------------------------------------|--------------------------------------------------------|
| <input type="checkbox"/> Datum Ausbruchsbeginn (Var_B_37_a)   | <input type="checkbox"/> Datum Meldung (Var_B_37_e)    |
| <input type="checkbox"/> Datum Erkrankungsbeginn (Var_B_37_b) | <input type="checkbox"/> Datum Behandlung (Var_B_37_f) |
| <input type="checkbox"/> Datum Beprobung Var_B_37_c)          | <input type="checkbox"/> Keine Angaben (Var_B_37_g)    |
| <input type="checkbox"/> Datum Nachweis (Var_B_37_d)          | <input type="checkbox"/> Andere (Var_B_37_h)           |

**37.x Andere\_x (Var\_B\_37\_h\_x)****Wenn Andere angekreuzt wurde, dann bitte näher erläutern:****(Text)****38. Welche Herkunftsangaben sind im Zusammenhang mit den Informationen zu Infektionen/Beprobungen/Kontrollen vorhanden?**

- |                                                                      |                                                             |
|----------------------------------------------------------------------|-------------------------------------------------------------|
| <input type="checkbox"/> Probenahmeort (Var_B_38_a)                  | <input type="checkbox"/> Labor (Var_B_38_f)                 |
| <input type="checkbox"/> Standort des erkrankten Tieres (Var_B_38_b) | <input type="checkbox"/> Keine Herkunftsangabe (Var_B_38_g) |
| <input type="checkbox"/> Betriebsort/Verarbeitungsort (Var_B_38_c)   | <input type="checkbox"/> Schlachthof Var_B_38_h)            |
| <input type="checkbox"/> Wohnort des Patienten (Var_B_38_d)          | <input type="checkbox"/> Zuständiges Amt (Var_B_38_i)       |

☐ Krankenhaus (Var\_B\_38\_e)☐ Andere (Var\_B\_38\_j)**38.x Andere\_x (Var\_B\_38\_j\_x)****Wenn Andere angekreuzt wurde, dann bitte näher erläutern:****(Text)**

39. Welche geographischen Angaben zur Herkunftsangabe sind im einzelnen Datensatz vorhanden?

☐ GIS-Information (Var\_B\_39\_a)☐ Amtskennung (Var\_B\_39\_f)☐ Adresse (Var\_B\_39\_b)☐ KfZ Kennzeichen (Var\_B\_39\_g)☐ VVVOnr (Var\_B\_39\_c)☐ Gemeindekennziffer (Var\_B\_39\_h)☐ PLZ (ohne weitere Adressangaben) (Var\_B\_39\_d)☐ keine geographische Angabe (Var\_B\_39\_i)☐ Landkreis (ohne weitere Adressangaben) (Var\_B\_39\_e)☐ Andere (Var\_B\_39\_j)**39.x Andere\_x (Var\_B\_39\_j\_x)****Wenn Andere angekreuzt wurde, dann bitte näher erläutern:****(Text)**

40. Ist der Herkunftsort näher beschrieben? (z.B. Betriebsart, Krankenhausstation)

(Var\_C\_44)

☐ Ja☐ Nein☐ Ja teilweise☐ Keine Angaben

## Bezug

41. Für welchen Zeitraum sind die genannten Informationen erhältlich? (Bezogen auf den Erreger bzw. die Erkrankung/Beprobungen/Kontrollen)

41.a Von  
(Var\_B\_41\_a)

(DD.MM.JJJJ)

41.b Bis (wenn fortlaufend nichts eintragen)  
(Var\_B\_41\_b)

(DD.MM.JJJJ)

42. Für welchen geographischen Bereich sind in der Datenquelle Daten vorhanden?  
Alle vorhandenen Ebenen angeben.

☐ Staat (Var\_B\_42\_a)

☐ Verwaltungsbezirk (Landkreis) (Var\_B\_42\_d)

☐ Bundesland (Var\_B\_42\_b)

☐ Gemeinde (Var\_B\_42\_e)

☐ Andere (Var\_B\_42\_c)

42.x Andere\_x (Var\_B\_42\_e\_x)

**Wenn Andere ausgewählt wurde, dann bitte näher erläutern:**

(Text)

43. Was ist das niedrigste Aggregationslevel, für welches Daten zur Verfügung stehen?  
(Var\_B\_43)

☐ Isolat (Erreger)

☐ Betrieb

☐ Probe

☐ Krankenhaus

☐ Individuum (fallbasiert)

☐ Stadt

☐ Ausbruch

☐ Gemeinde

☐ Haushalt

☐ Landkreis

☐ Tiergruppe

☐ Bundesland

☐ Charge

☐ Nation

☐ Warengruppe

☐ Keine Angaben

☐ Bestand☐ Andere

43.x Andere\_x (Var\_B\_43\_x)

**Wenn Andere angekreuzt wurde, dann bitte näher erläutern:**

(Text)

44. Erfolgt eine Stichprobenziehung für diese Art von Infektionsdaten?

(Var\_B\_44)

☐ Ja☐ Nein☐ Keine Angaben

45. Wer ist an der Erhebung der Daten beteiligt (Beprobung und Befundung)?

☐ Amt (Var\_B\_45\_a)☐ Labor (Var\_B\_45\_e)☐ Medizinisches Fachpersonal (Var\_B\_45\_b)☐ Privatperson (Var\_B\_45\_f)☐ LandwirtInnen/ProduzentInnen (Var\_B\_45\_c)☐ Keine Angaben (Var\_B\_45\_g)☐ Privates Unternehmen (Var\_B\_45\_d)☐ Andere (Var\_B\_45\_h)

45.x Andere\_x (Var\_B\_45\_h\_x)

**Wenn Andere angekreuzt wurde, dann bitte näher erläutern:**

(Text)

46. Wurden die in der Quelle enthaltenen Daten in irgendeiner Form bearbeitet, die hinsichtlich einer sekundären Nutzung relevant wären?

☐ Nein (Var\_B\_46\_a)☐ Erneute Datenauswahl und Reduktion (Var\_B\_46\_e)☐ Pseudonymisierung (Var\_B\_46\_b)☐ Gewichtung (Var\_B\_46\_f)☐ Anonymisierung (Var\_B\_46\_c)☐ Keine Angaben (Var\_B\_46\_g)☐ Zusammenfassen detaillierter Daten  
zu größeren Einheiten (Var\_B\_46\_d)☐ Andere (Var\_B\_46\_h)

46.x Andere\_x (Var\_B\_46\_h\_x)

**Wenn Andere angekreuzt wurde, dann bitte näher erläutern:**

(Text)

47. Wie schnell liegen die Daten in der Datenquelle vor, nachdem sie in die Datenquelle eingetragen wurden?

☐ Echtzeit (Var\_b\_47\_a)

☐ Vierteljährlich (Var\_b\_47\_f)

☐ Täglich (Var\_b\_47\_b)

☐ Halbjährlich (Var\_b\_47\_g)

☐ Wöchentlich (Var\_b\_47\_c)

☐ Jährlich (Var\_b\_47\_h)

☐ 14-tägig (Var\_b\_47\_d)

☐ Keine Angaben (Var\_b\_47\_i)

☐ Monatlich (Var\_b\_47\_e)

☐ Andere (Var\_b\_47\_j)

**47.x Andere\_x (Var\_b\_47\_j\_x)**

**Wenn Andere angekreuzt wurde, dann bitte näher erläutern:**

**(Text)**

48. Warum wurden die Angaben zum Erreger bzw. die Erkrankung nicht vollständig erfasst, bzw. warum kann der Erreger oder die Erkrankung nicht in die Analyse einbezogen werden?

(Var\_B\_48)

**(Text)**



49. Erläuterung zu systematischen Fehlern und Datengenauigkeit

(Var\_B\_49)

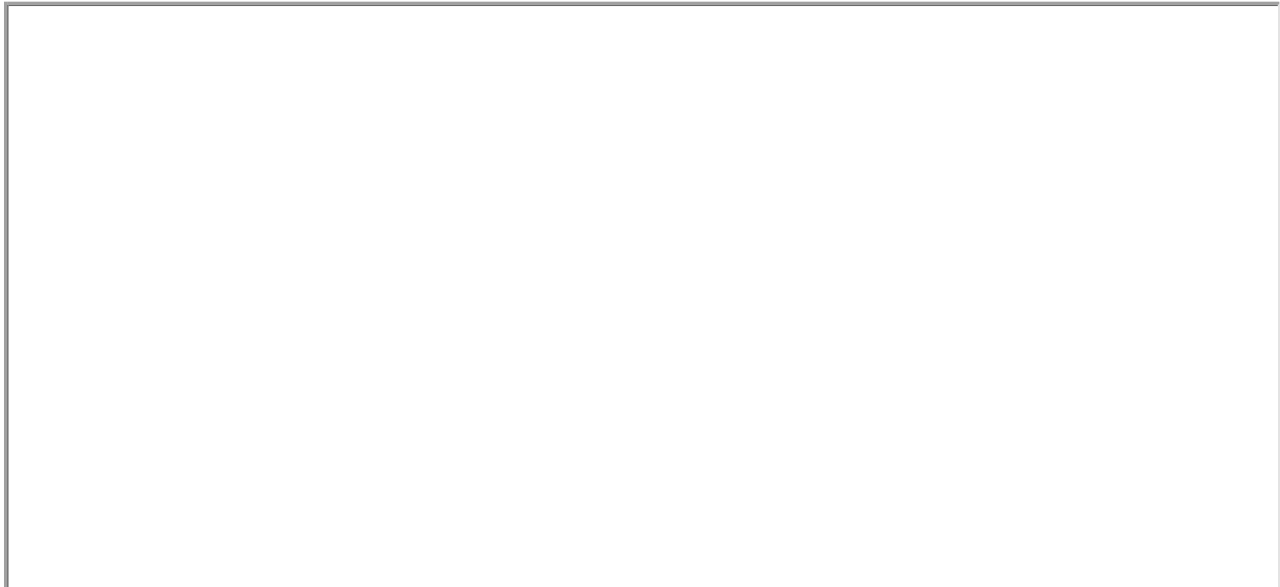

(Text)

50. Sonstige Kommentare und Hinweise, welche bisher nicht erfasst wurden (Var\_B\_50)

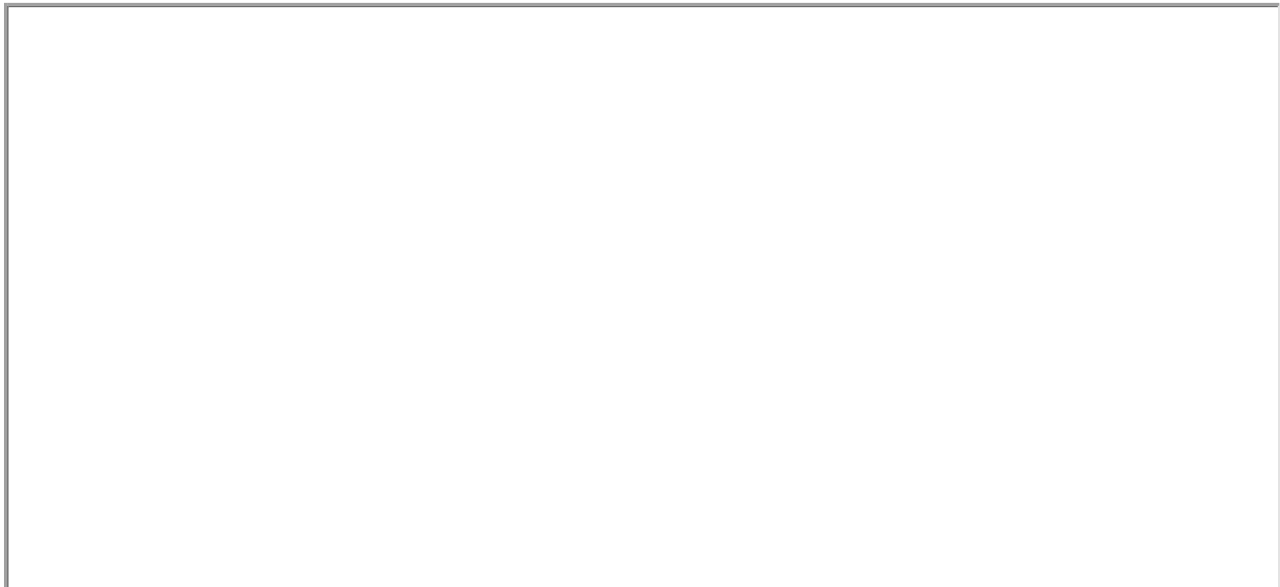

(Text)

## C Beschreibung einzelner Variablen

Siehe Excel-Datei ([D Beschreibung einzelner Variablen](#))
